# Supplementary material
Source: Springer Nature journal article supplement (https://hal.science/hal-01290542v1/file/13567_2013_346_MOESM2_ESM.pdf)

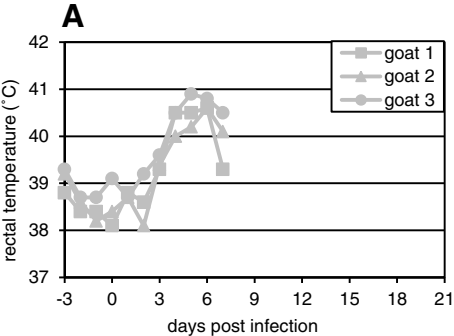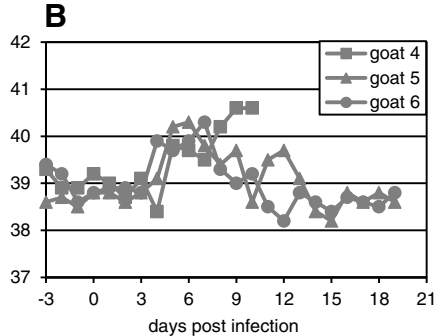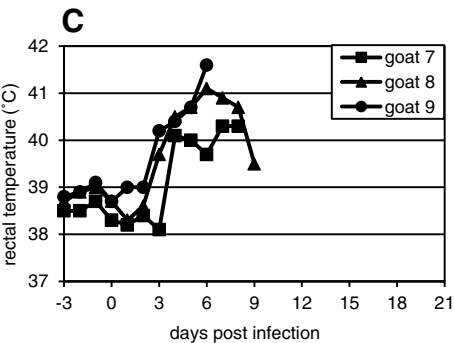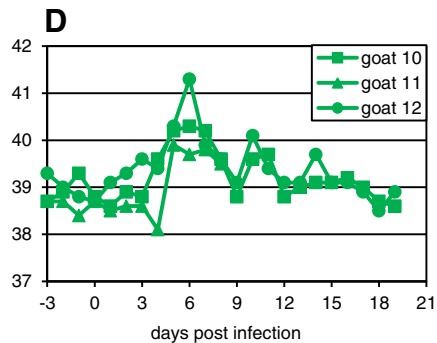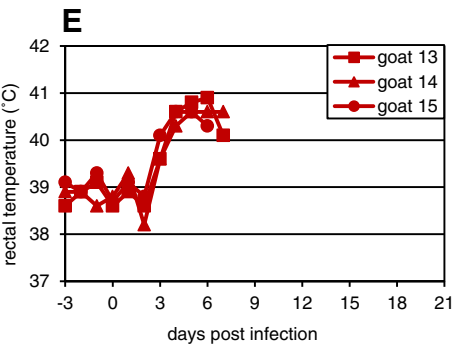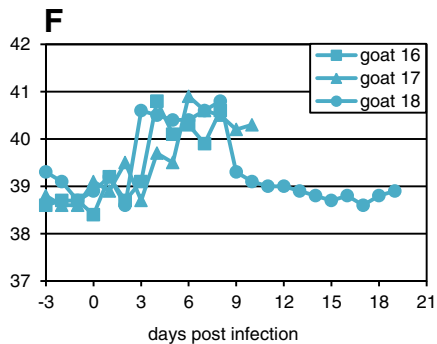

Supplement: MOESM2 [file 13567_2013_346_MOESM2_ESM.pdf]
